# Supplementary material for: Clinical effectiveness of care managers in collaborative primary health care for patients with depression: 12- and 24-month follow-up of a pragmatic cluster randomized controlled trial
Source: Springer Nature journal article supplement (doi:10.1186/s12875-022-01803-x), 2022-08-09
Supplement: MOESM1 [file 23350612]

SELF-EFFICACY/ CONFIDENCE IN OWN ABILITY

English version, translation from Swedish

Below are some questions about your confidence and the support you received from the health care center during your depression. Next to each question, mark an X in the box that you think best matches your degree of confidence.

| <b>How confident are you that you can do the following things that can reduce or prevent symptoms of depression?</b>     | <b>Not at all confident<br/>0</b> | <b>Somewhat confident<br/>1</b> | <b>Moderately confident<br/>2</b> | <b>Very confident<br/>3</b> | <b>Completely confident<br/>4</b> |
|--------------------------------------------------------------------------------------------------------------------------|-----------------------------------|---------------------------------|-----------------------------------|-----------------------------|-----------------------------------|
| 1. If you should feel depressed – can you then influence your feeling through activity?                                  |                                   |                                 |                                   |                             |                                   |
| 2. If you should feel anxiety – can you then influence your feeling through activity?                                    |                                   |                                 |                                   |                             |                                   |
| 3. If you should feel stressed, can you then influence your feeling through activity?                                    |                                   |                                 |                                   |                             |                                   |
| 4. If you think of yourself as inferior or that you are not good [enough] – can you affect the thought through activity? |                                   |                                 |                                   |                             |                                   |
| <b>How confident are you that you know:</b>                                                                              | <b>Not at all confident<br/>0</b> | <b>Somewhat confident<br/>1</b> | <b>Moderately confident<br/>2</b> | <b>Very confident<br/>3</b> | <b>Completely confident<br/>4</b> |
| 5. . . . what you can do if you get sleep difficulties (for example sleep too much or too little)                        |                                   |                                 |                                   |                             |                                   |
| 6. . . . what you could do to feel better                                                                                |                                   |                                 |                                   |                             |                                   |
| 7. . . . when you should contact or visit health care providers about your illness/symptoms                              |                                   |                                 |                                   |                             |                                   |
| 8. . . . how to get staff at the primary care center to understand your problems                                         |                                   |                                 |                                   |                             |                                   |
| <b>How confident are you that you can . . .</b>                                                                          | <b>Not at all confident<br/>0</b> | <b>Somewhat confident<br/>1</b> | <b>Moderately confident<br/>2</b> | <b>Very confident<br/>3</b> | <b>Completely confident<br/>4</b> |
| 9. . . . maintain your usual social activities                                                                           |                                   |                                 |                                   |                             |                                   |
| 10. . . . maintain your usual activities at home                                                                         |                                   |                                 |                                   |                             |                                   |
| 11. . . . maintain your usual activities outside the home                                                                |                                   |                                 |                                   |                             |                                   |
| 12. . . . overcome obstacles and focus on opportunities                                                                  |                                   |                                 |                                   |                             |                                   |
| 13. . . . handle difficult or new tasks                                                                                  |                                   |                                 |                                   |                             |                                   |
| 14. . . . cope with setbacks in certain demanding situations                                                             |                                   |                                 |                                   |                             |                                   |
| 15. . . . get professional emotional support if you need it                                                              |                                   |                                 |                                   |                             |                                   |

|                                                                                    |                        |                         |                        |                  |                        |
|------------------------------------------------------------------------------------|------------------------|-------------------------|------------------------|------------------|------------------------|
| 16. . . . handle feelings of loneliness                                            |                        |                         |                        |                  |                        |
| 17. . . . get information about your illness/symptoms from the primary care center |                        |                         |                        |                  |                        |
| <b>How well are the statements below in accordance with your situation</b>         | <b>Not at all true</b> | <b>Only partly true</b> | <b>Moderately true</b> | <b>Very true</b> | <b>Completely true</b> |
| 18. I received good information about my illness/my symptoms                       |                        |                         |                        |                  |                        |
| 19. I received good information about what treatment would be like                 |                        |                         |                        |                  |                        |
| 20. I felt involved in decisions about my treatment                                |                        |                         |                        |                  |                        |
