# Supplementary material for: Clinical effectiveness of care managers in collaborative primary health care for patients with depression: 12- and 24-month follow-up of a pragmatic cluster randomized controlled trial
Source: Springer Nature journal article supplement (doi:10.1186/s12875-022-01803-x), 2022-08-09
Supplement: MOESM2 [file 23350612]

Supplemental table 1. Background characteristics of the study group at baseline, at 12 months (after dropout), and at 24 months (after further dropout). These data were measured once, at baseline.

|                                                        | Study group at baseline    |                  |       | Study group at the 12-month follow-up (after dropout) |                  |       | Study group remaining at the 24-month follow-up (after further dropout) |                  |       |
|--------------------------------------------------------|----------------------------|------------------|-------|-------------------------------------------------------|------------------|-------|-------------------------------------------------------------------------|------------------|-------|
| Background characteristics measured at baseline        | Intervention<br>n<br>n=192 | Control<br>n=184 | $p^1$ | Intervention<br>n<br>n=135                            | Control<br>n=146 | $p^2$ | Intervention<br>n<br>n=121                                              | Control<br>n=127 | $p^3$ |
| <i>Age</i> , mean (SD)                                 | 40.8 (15.0)                | 41.6 (15.4)      | 0.60  | 42.1 (14.2)                                           | 42.3 (15.4)      | 0.91  | 42.9 (14.3)                                                             | 42.5 (14.8)      | 0.85  |
| <i>Sex</i> n (%)                                       |                            |                  |       |                                                       |                  |       |                                                                         |                  |       |
| Female                                                 | 131 (68.2)                 | 137 (74.5)       | 0.18  | 95 (70.4)                                             | 111 (76.0)       | 0.28  | 87 (71.9)                                                               | 97 (76.4)        | 0.42  |
| Male                                                   | 61 (31.8)                  | 47 (25.5)        |       | 40 (29.6)                                             | 35 (24.0)        |       | 34 (28.1)                                                               | 30 (23.6)        |       |
| <i>Working</i> n (%)                                   |                            |                  |       |                                                       |                  |       |                                                                         |                  |       |
| Full-time                                              | 157 (87.7)                 | 149 (87.6)       | 0.99  | 113 (88.3)                                            | 120 (87.6)       | 0.86  | 103 (89.6)                                                              | 102 (85.7)       | 0.37  |
| Other (25%-75%)                                        | 22 (12.3)                  | 21 (12.4)        |       | 15 (11.7)                                             | 17 (12.4)        |       | 12 (10.4)                                                               | 17 (14.3)        |       |
| <i>Marital status</i> , n (%)                          |                            |                  |       |                                                       |                  |       |                                                                         |                  |       |
| Cohabiting                                             | 124 (65.3)                 | 123 (66.8)       | 0.75  | 90 (66.7)                                             | 97 (66.4)        | 0.97  | 82 (68.9)                                                               | 91 (71.7)        | 0.64  |
| Single                                                 | 66 (34.7)                  | 61 (33.2)        |       | 45 (33.3)                                             | 49 (33.6)        |       | 37 (31.1)                                                               | 36 (28.3)        |       |
| <i>Born Outside Nordic country</i> n (%)               | 23 (12)                    | 27 (14.8)        | 0.44  | 11 (8.1)                                              | 18 (12.4)        | 0.24  | 9 (7.4)                                                                 | 15 (11.9)        | 0.24  |
| <i>Educational level</i> n (%)                         |                            |                  |       |                                                       |                  |       |                                                                         |                  |       |
| Primary- Secondary                                     | 120 (62.8)                 | 117 (63.9)       | 0.82  | 84 (62.2)                                             | 91 (62.3)        | 0.99  | 75 (62.0)                                                               | 78 (61.4)        | 0.93  |
| University or college                                  | 71 (37.2)                  | 66 (36.1)        |       | 51 (37.8)                                             | 55 (37.7)        |       | 46 (38.0)                                                               | 49 (38.6)        |       |
| <i>Leisure-time physical activity, Sedentary</i> n (%) | 25 (13.1)                  | 33 (17.9)        | 0.20  | 17 (12.6)                                             | 25 (17.1)        | 0.29  | 16 (13.2)                                                               | 22 (17.3)        | 0.37  |
| <i>Smoking yes+sometimes</i> n (%)                     | 45 (23.6)                  | 56 (30.4)        | 0.13  | 25 (18.5)                                             | 37 (25.3)        | 0.17  | 24 (19.8)                                                               | 31 (24.4)        | 0.39  |
| <i>Alcohol</i> at least once a week n (%)              | 75 (39.5)                  | 74 (40.2)        | 0.88  | 50 (37.6)                                             | 58 (39.7)        | 0.72  | 50 (41.7)                                                               | 53 (41.7)        | 0.99  |
| <i>Sick leave</i> n (%)                                |                            |                  |       |                                                       |                  |       |                                                                         |                  |       |
| Sick leave last year, yes                              | 83 (43.2)                  | 66 (35.9)        | 0.15  | 59 (43.7)                                             | 53 (36.3)        | 0.21  | 54 (44.6)                                                               | 46 (36.2)        | 0.18  |
| On sick leave at baseline                              | 93 (48.4)                  | 94 (51.1)        | 0.61  | 68 (50.4)                                             | 70 (47.9)        | 0.69  | 61 (50.4)                                                               | 63 (49.6)        | 0.90  |
| <i>Depressive symptoms, MADRS-S</i> m (SD)             | 20.8 (7.2)                 | 22.0 (7.1)       | 0.12  | 20.5 (7.5)                                            | 21.7 (7.0)       | 0.14  | 20.1 (7.1)                                                              | 21.6 (6.9)       | 0.09  |

|                                                                                                                                                                                                                                                                                                                                                                                                                                                                                                                                                                                                                                                                               |             |             |      |             |             |      |             |             |      |
|-------------------------------------------------------------------------------------------------------------------------------------------------------------------------------------------------------------------------------------------------------------------------------------------------------------------------------------------------------------------------------------------------------------------------------------------------------------------------------------------------------------------------------------------------------------------------------------------------------------------------------------------------------------------------------|-------------|-------------|------|-------------|-------------|------|-------------|-------------|------|
| <i>Antidepressant medication, yes n (%)<sup>4</sup></i>                                                                                                                                                                                                                                                                                                                                                                                                                                                                                                                                                                                                                       | 101 (52.6)  | 115 (62.5)  | 0.05 | 56 (41.5)   | 72 (49.3)   | 0.19 | 44 (36.4)   | 49 (38.6)   | 0.72 |
| <i>Quality of life, EQ-5D-3L m (SD)</i>                                                                                                                                                                                                                                                                                                                                                                                                                                                                                                                                                                                                                                       | 0.58 (0.24) | 0.56 (0.25) | 0.41 | 0.58 (0.25) | 0.57 (0.25) | 0.86 | 0.59 (0.25) | 0.55 (0.25) | 0.27 |
| <p>Abbreviations: m: mean; SD: standard deviation; MADRS-S: Montgomery-Asberg Depression Rating Scale-self-rating version; EQ-5D-3L: EuroQol five Dimension 3 L scale, English tariff</p> <p><sup>1</sup> <i>P</i> for the difference between background characteristics in the intervention and control group at baseline.</p> <p><sup>2</sup> <i>P</i> for the difference between background characteristics in the intervention and control group followed up at 12 months (after dropout).</p> <p><sup>3</sup> <i>P</i> for the difference between background characteristics in the intervention and control group followed up at 24 months (after further dropout).</p> |             |             |      |             |             |      |             |             |      |
